# Supplementary material
Source: MDPI journal article supplement (https://www.mdpi.com/2571-6255/2/2/33)
Supplement: s1 [file s1 › Figure S2.pdf]

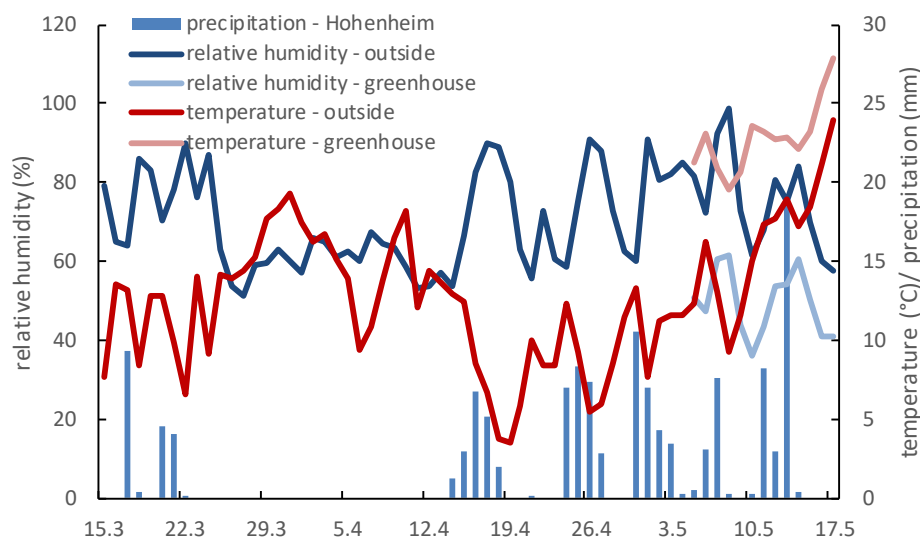

**Figure S2.** Average daily temperature, relative humidity and precipitation.

Relative humidity and air temperature in the greenhouse (treatment “10”) and outside (treatment “60”) were logged at hourly resolution (Tinytag TGU-4500 and Tinytag TGP-4017, Gemini Dataloggers Ltd., Chichester, UK), and average daily values were computed. “precipitation – Hohenheim” corresponds to the precipitation recorded at the Hohenheim meteorological station (Hohenheim, <http://www.wetter-bw.de>) and provides an approximation on the precipitation amounts received in treatment “60”. Outside weather conditions during the exposure period of treatment “60” were somewhat warmer and dryer compared to the weather conditions within the National Park Mljet (island of Mljet, Croatia) just after leaf abscission of deciduous species. In this region, leaf abscission of deciduous species usually ends in November/December. The meteorological station within the Parks perimeter (Govedari) has an average monthly temperature (1981-2010) of 9.9°C and 8.7°C for December and January, respectively. The average precipitation sum for the period December and January amounts 191.8 mm. Average temperature within the first and second 30 days of the treatment “60” were 10.5°C and 8.4°C, respectively. Furthermore, 129.4 mm of precipitation were recorded at the Hohenheim meteorological station during the whole exposure period of the “60” treatment.
