# Supplementary material
Source: MDPI journal article supplement (https://www.mdpi.com/2571-6255/2/2/33)
Supplement: s1 [file s1 › Figure S3.pdf]

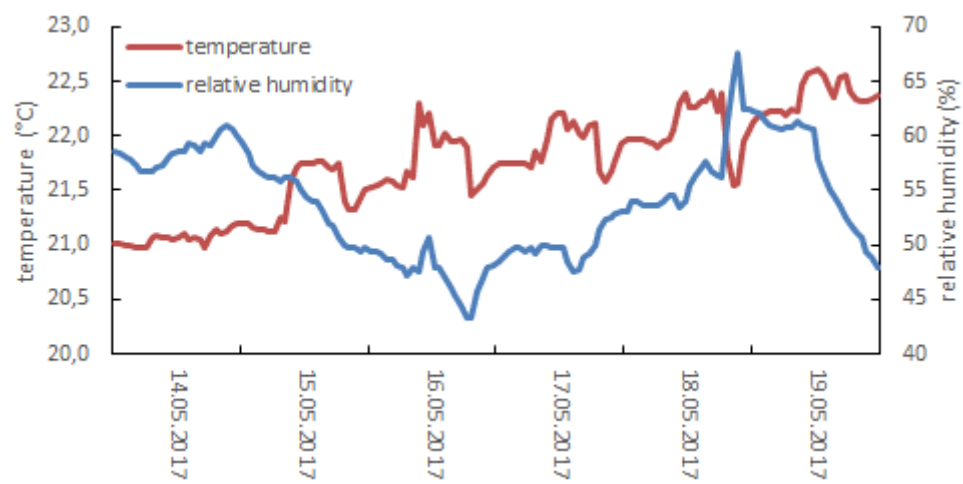

**Figure S3.** Temperature and relative humidity in the fire behavior testing facilities at hourly resolution.
