# Supplementary material
Source: MDPI journal article supplement (https://www.mdpi.com/2571-6255/2/2/33)
Supplement: s1 [file s1 › Figure S4.pdf]

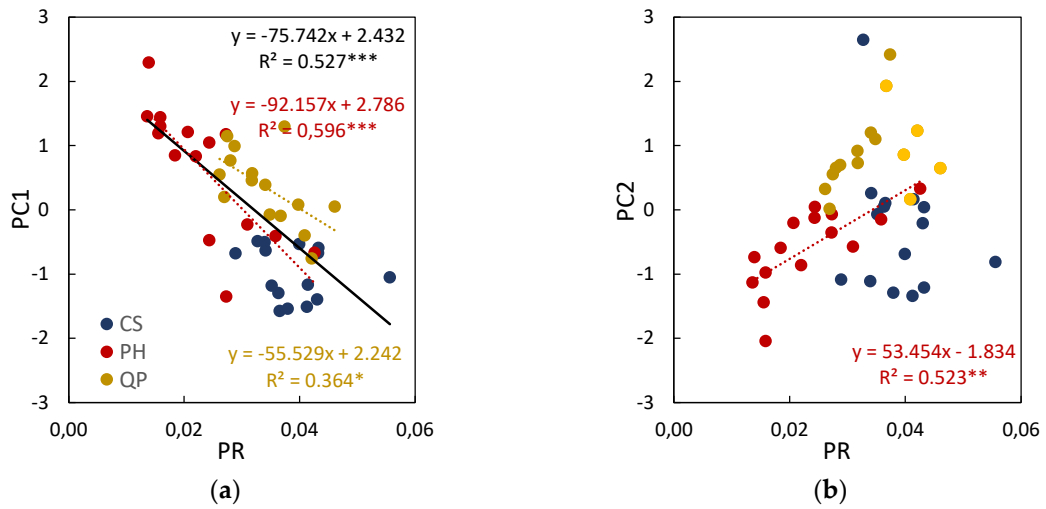

**Figure S4.** Pairwise regression analyses showing relationships between packing ratio and score to individual principal component. **(a)** packing ratio (PR) and score to the first principal component (PC1), **(b)** PR and score to the second principal component (PC2). For each pair of variables, the analyses were conducted on the whole data set (black regression line and equation), and separately for each species. Data points, regression lines and equations of individual species are consistently color coded: red corresponding to Aleppo pine (*Pinus halepensis* Mill.), blue to carob (*Ceratonia siliqua* L.), and yellow to downy oak (*Quercus pubescens* Willd.). Regression line, regression equation and significance level are shown only if given relationship is significant. n.s.  $P > 0.10$ , +  $P \leq 0.10$ , \* $P \leq 0.05$ , \*\* $P \leq 0.01$  and \*\*\* $P \leq 0.001$ .
