# Supplementary material
Source: MDPI journal article supplement (https://www.mdpi.com/2571-6255/2/2/33)
Supplement: s1 [file s1 › Figure S5.pdf]

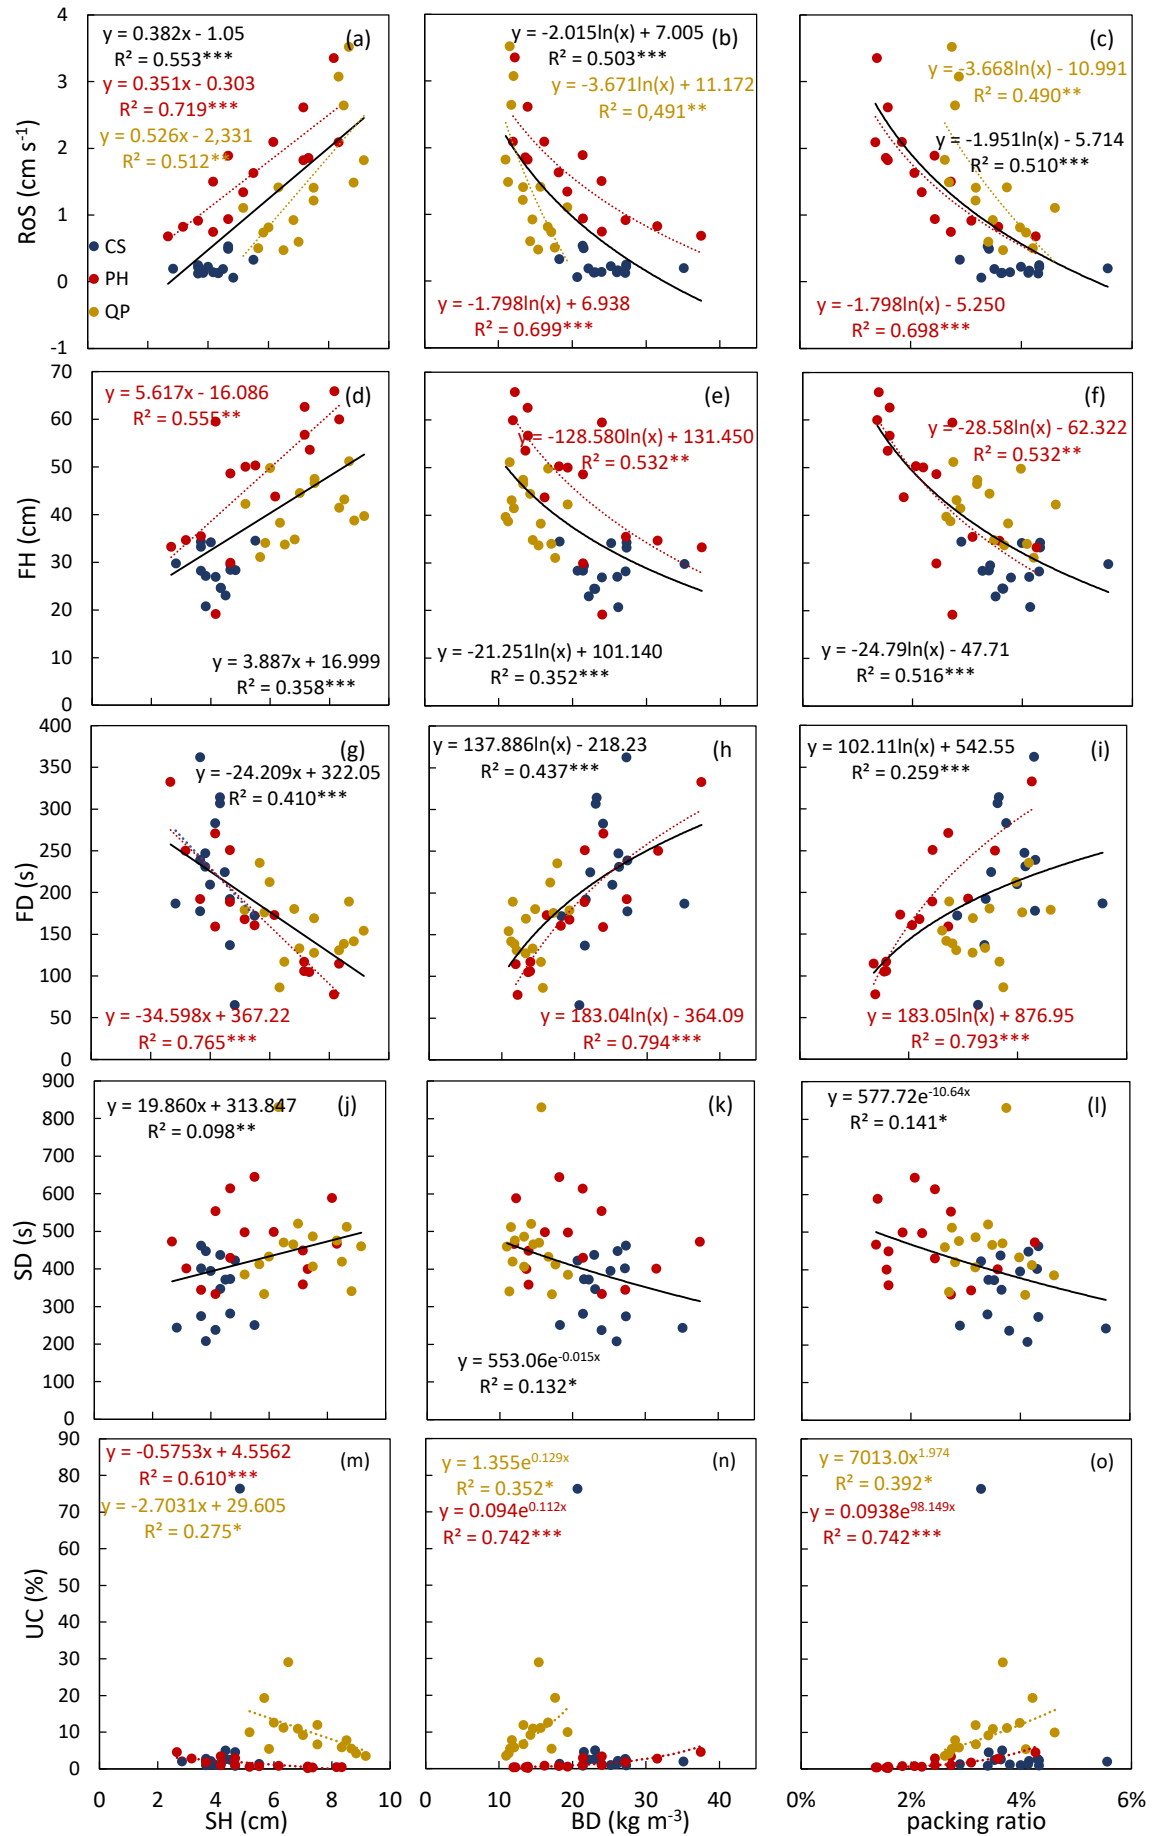

**Figure S5.** Pairwise regression analyses showing relationships between individual structural fuel bed

characteristics and fire behavior characteristics. (a) sample height (SH) and rate of spread (RoS), (b) bulk density (BD) and RoS, (c) packing ratio (PR) and RoS, (d) SH and flame height (FH), (e) BD and FH, (f) PR and FH, (g) SH and flaming duration (FD), (h) BD and FD, (i) PR and FD, (j) SH and smoldering duration (SD), (k) BD and SD, (l) PR and SD, (m) SH and unconsumed (UC), (n) BD and UC, (o) PR and UC. For each pair of parameters, the analyses were conducted on the whole data set (black regression line and equation), and separately for each species. Data points, regression lines and equations of individual species are consistently color coded: red corresponding to Aleppo pine (*Pinus halepensis* Mill.), blue to carob (*Ceratonia siliqua* L.), and yellow to downy oak (*Quercus pubescens* Willd.). Regression line, regression equation and significance level are shown only if given relationship is significant. n.s.  $P > 0.10$ , +  $P \leq 0.10$ , \* $P \leq 0.05$ , \*\* $P \leq 0.01$  and \*\*\* $P \leq 0.001$ .
