# Supplementary material
Source: MDPI journal article supplement (https://www.mdpi.com/2571-6255/2/2/33)

**Table S1.** Video frames with the maximum flame height

Species: Aleppo pine (*Pinus halepensis* Mill.)

Treatment/ replicate      1                      2                      3                      4                      5

0

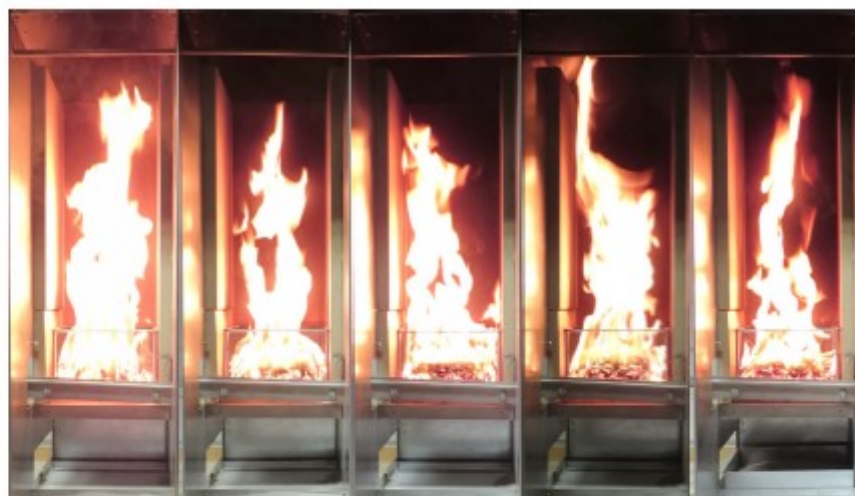

10

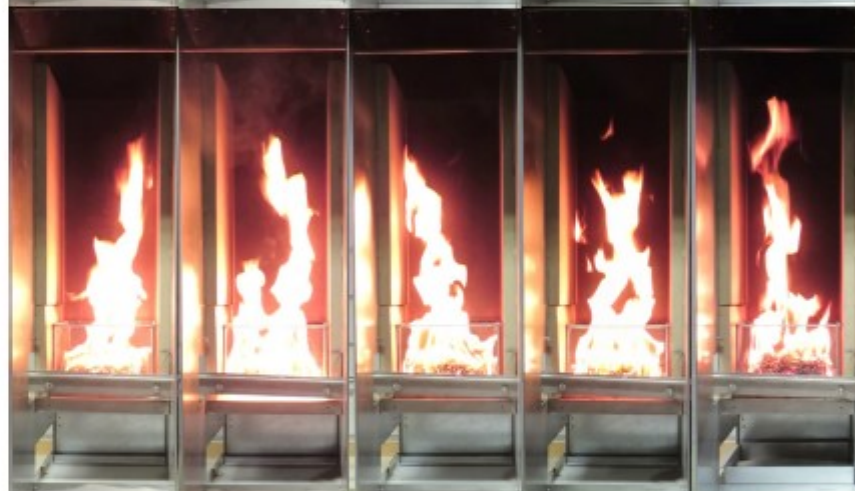

60

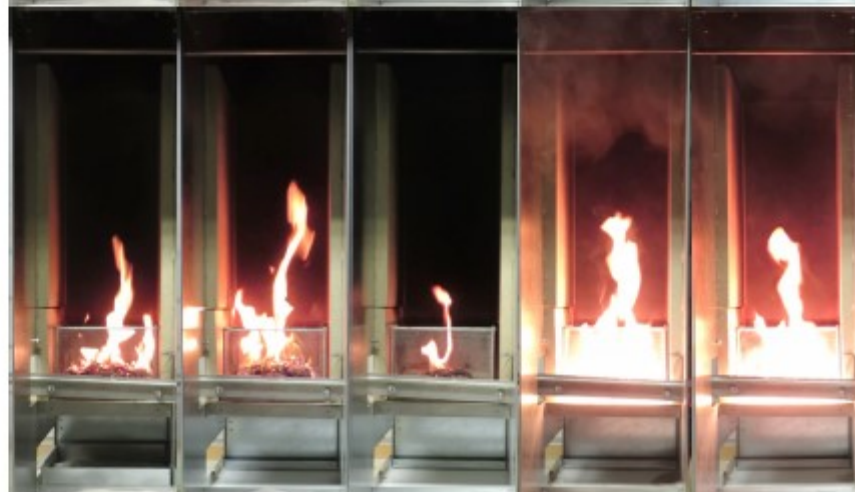

Species: Carob (*Ceratonia siliqua* L.)

Treatment/ replicate

1

2

3

4

5

0

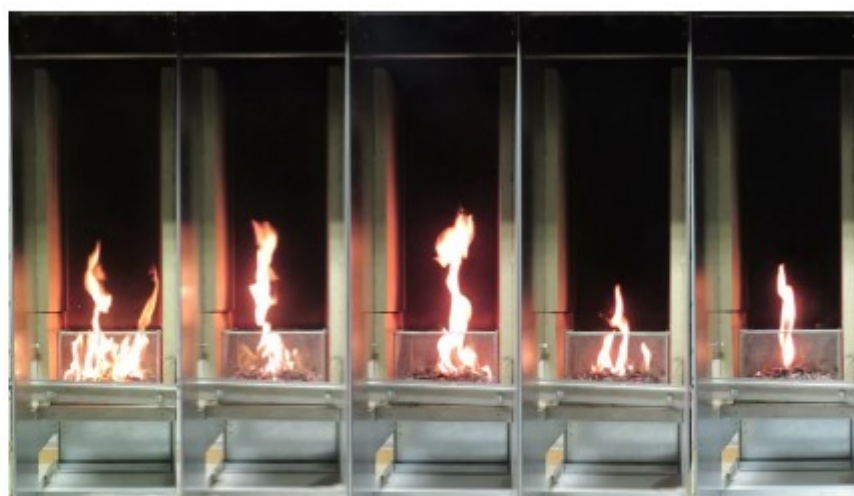

10

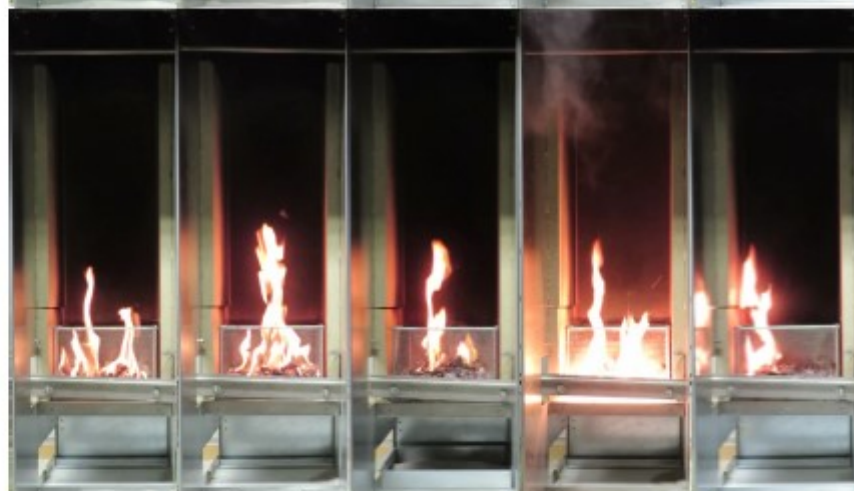

60

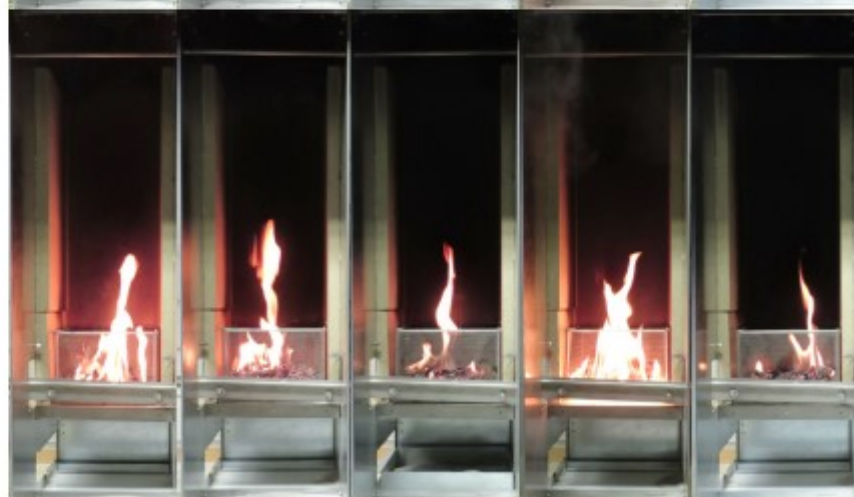

Species: Downy oak (*Quercus pubescens* Willd.)

Treatment/ replicate

1

2

3

4

5

0

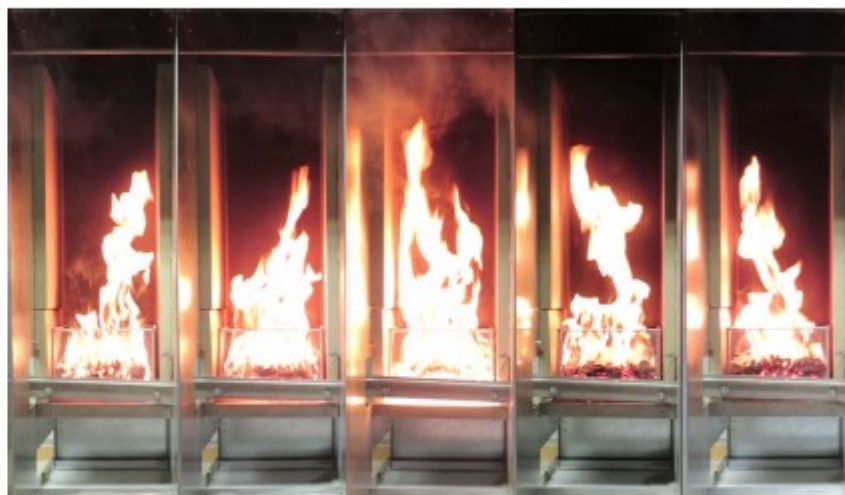

10

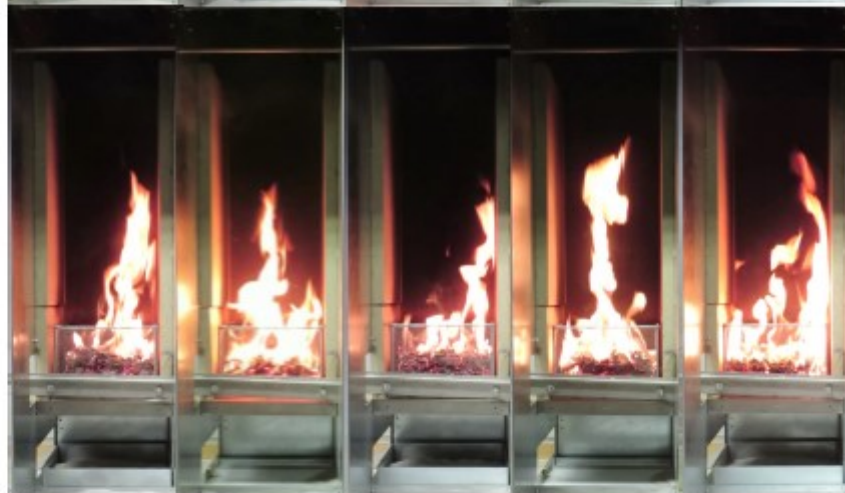

60

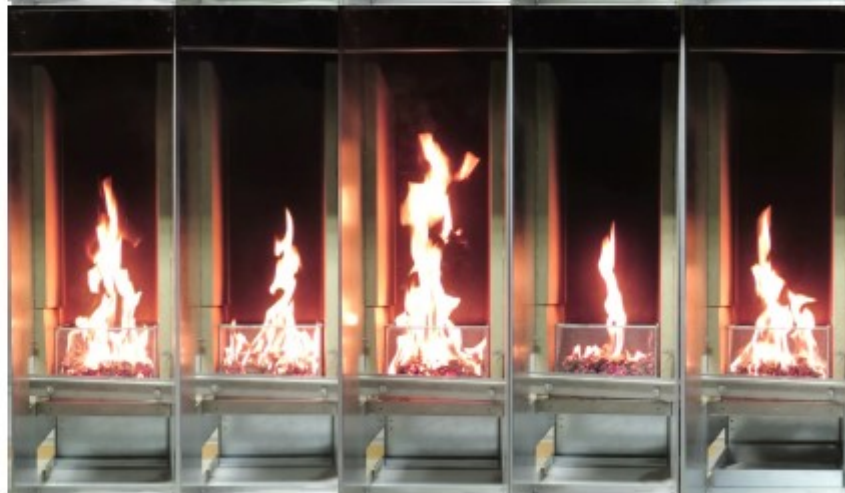

Supplement: s1 [file s1 › Table S1.pdf]
