# Supplementary material
Source: MDPI journal article supplement (https://www.mdpi.com/2571-6255/2/2/33)
Supplement: s1 [file s1 › Table S3.pdf]

**Table S3.** Means and standard errors (in brackets) of the fire behavior characteristics. Flaming duration (FD), smoldering duration (SD), flame height (FH), rate of spread (RoS) and unconsumed (UC). Results of the Two-Way ANOVA with species and treatment as fixed factors, pairwise contrasts with Tukey's adjustment for multiple comparisons, and effect size (e.s.), calculated as the partial eta-squared, are reported. Treatments (treat) are indicated as following: "0" = samples tested immediately after fuel bed construction, "10" = constructed fuel beds were wetted, and tested after 8 – 12 days stay in the greenhouse, "60" = constructed fuel beds were wetted and tested after 59-63 days exposure to outside conditions. Different capital letters indicate statistically significant differences ( $P \leq 0.05$ ) between treatments. Different lowercase letters indicate statistically significant differences between species.

| species                 | treat | FD (s)                | SD (s)               | $\ln$ FH (cm)      | $\ln$ RoS (cm s <sup>-1</sup> ) | UC (%)              |
|-------------------------|-------|-----------------------|----------------------|--------------------|---------------------------------|---------------------|
| <i>Ceratoniasiliqua</i> | 0     | 222.19 Ab<br>(23.24)  | 380.34<br>(35.21)    | 28.68 Aa<br>(2.68) | 0.27 Aa<br>(0.07)               | 2.30<br>(0.62)      |
|                         |       | 205.37Aa<br>(50.22)   | 387.51<br>(30.44)    | 28.21 Aa<br>(1.62) | 0.22 Aa<br>(0.08)               | 16.90<br>(14.86)    |
|                         | 60    | 241.61 Aa<br>(26.51)  | 261.70<br>(23.59)    | 28.51 Aa<br>(1.66) | 0.17 Aa<br>(0.02)               | 2.07<br>(0.74)      |
|                         |       | 103.91 Aa<br>(6.98)   | 452.13<br>(38.95)    | 59.72 Bb<br>(2.15) | 2.35 Ab<br>(0.29)               | 0.37<br>(0.06)      |
|                         | 10    | 169.73 ABa<br>(5.36)  | 561.44<br>(29.85)    | 50.42 Bb<br>(2.54) | 1.69 ABb<br>(0.13)              | 0.79<br>(0.09)      |
|                         |       | 259.22 Ba<br>(22.54)  | 396.02<br>(26.12)    | 30.47 Aa<br>(2.99) | 0.82 Bb<br>(0.05)               | 3.05<br>(0.45)      |
| <i>Pinushalepensis</i>  | 0     | 147.90 Aab<br>(11.25) | 454.114<br>(19.13)   | 44.39 Ab<br>(2.04) | 2.46 Ab<br>(0.42)               | 6.89<br>(1.42)      |
|                         |       | 142.01 Aa<br>(16.44)  | 528.19<br>(81.33)    | 40.74 Ab<br>(2.29) | 1.17 ABb<br>(0.17)              | 8.4<br>(1.33)       |
|                         | 10    | 183.83 Aa<br>(20.04)  | 406.21<br>(23.06)    | 38.15 Aa<br>(3.46) | 0.72 Bb<br>(0.12)               | 15.23<br>(4.11)     |
|                         |       | 223.06 b<br>(19.34)   | 343.18 a<br>(22.29)  | 28.47 a<br>(1.09)  | 0.22 a<br>(0.03)                | 7.09<br>(4.96)      |
|                         | 60    | 177.62 ab<br>(18.58)  | 469.86 b<br>(25.13)  | 46.87 b<br>(3.54)  | 1.62 b<br>(0.19)                | 1.40<br>(0.35)      |
|                         |       | 157.91 a<br>(10.02)   | 462.84 b<br>(29.92)  | 41.09 b<br>(1.58)  | 1.44 b<br>(0.24)                | 10.17<br>(1.71)     |
| <i>Quercuspubescens</i> | 0     | 158.00 A<br>(15.44)   | 428.86 AB<br>(19.53) | 44.26 B<br>(3.60)  | 1.69 A<br>(0.31)                | 3.19<br>(0.87)      |
|                         |       | 172.37 A<br>(17.80)   | 492.38 B<br>(34.77)  | 39.79 B<br>(2.70)  | 1.03 B<br>(0.18)                | 8.7<br>(4.9)        |
|                         | 10    | 228.22 B<br>(15.09)   | 354.64 A<br>(21.87)  | 32.38 a<br>(1.87)  | 0.57 C<br>(0.09)                | 6.78<br>(2.06)      |
|                         |       | 0.006<br>e.s.         | <0.001<br>0.363      | <0.001<br>0.660    | <0.001<br>0.857                 | <0.001 <sup>§</sup> |
|                         | 60    | 0.002<br>e.s.         | <0.001<br>0.349      | <0.001<br>0.409    | <0.001<br>0.471                 | 0.230 <sup>§</sup>  |
|                         |       | 0.065<br>e.s.         | 0.710<br>0.056       | <0.001<br>0.448    | 0.169<br>0.160                  |                     |
| species                 | P     | 0.006                 | <0.001               | <0.001             | <0.001                          | <0.001 <sup>§</sup> |
| e.s.                    |       | 0.245                 | 0.363                | 0.660              | 0.857                           |                     |
| treatment               | P     | 0.002                 | <0.001               | <0.001             | <0.001                          | 0.230 <sup>§</sup>  |
| e.s.                    |       | 0.286                 | 0.349                | 0.409              | 0.471                           |                     |
| spec x treat            | P     | 0.065                 | 0.710                | <0.001             | 0.169                           |                     |
| e.s.                    |       | 0.213                 | 0.056                | 0.448              | 0.160                           |                     |

<sup>§</sup> significance of species and treatment effects on UC was tested by Kruskal-Willis rank sum test as data could not be transformed in order to satisfy requirements of the ANOVA

FH and RoS were log transformed before ANOVA
