# Supplementary material
Source: MDPI journal article supplement (https://www.mdpi.com/2571-6255/2/2/33)
Supplement: s1 [file s1 › Table S4.pdf]

**Table S4.** Measured fuel bed structure and fire behavior data.

Variable meanings: sample height (SH), bulk density (BD), packing ratio (PR), rate of spread (RoS), flaming duration (FD), smoldering duration (SD), maximal flame height (FH), and unconsumed (UC). Species ("spec" column) are given as: "CS" = carob (*Ceratonia siliqua* L.), "PH" = Aleppo pine (*Pinus halepensis* Mill.), and "QP" = downy oak (*Quercus pubescens* Willd.). Treatments ("treat" column) are indicated as follows: "0" = samples tested immediately after fuel bed construction, "10" = constructed fuel beds were wetted, and tested after 8 – 12 days stay in the greenhouse, "60" = constructed fuel beds were wetted and tested after 59-63 days exposure to outside conditions.

| spec | treat | SH [cm] | BD [kg/m <sup>3</sup> ] | PR    | RoS [cm/s] | FD [s] | SD [s] | FH [cm] | UC [%] |
|------|-------|---------|-------------------------|-------|------------|--------|--------|---------|--------|
| CS   | 0     | 4,67    | 21,58                   | 0,034 | 0,49       | 191,92 | 372,66 | 29,43   | 4,52   |
| CS   | 0     | 4,00    | 25,24                   | 0,040 | 0,22       | 209,49 | 394,35 | 34,16   | 1,01   |
| CS   | 0     | 5,50    | 18,27                   | 0,029 | 0,33       | 172,04 | 250,48 | 34,46   | 1,31   |
| CS   | 0     | 3,83    | 26,19                   | 0,041 | 0,16       | 230,87 | 447,28 | 20,70   | 2,11   |
| CS   | 0     | 4,33    | 22,97                   | 0,036 | 0,13       | 306,65 | 436,92 | 24,63   | 2,57   |
| CS   | 10    | 4,50    | 22,22                   | 0,035 | 0,19       | 224,23 | 371,44 | 22,97   | 2,43   |
| CS   | 10    | 3,67    | 27,34                   | 0,043 | 0,22       | 238,72 | 461,72 | 33,19   | 2,27   |
| CS   | 10    | 4,67    | 21,45                   | 0,034 | 0,53       | 136,67 | 280,90 | 28,38   | 0,79   |
| CS   | 10    | 4,83    | 20,71                   | 0,033 | 0,06       | 65,11  | 422,29 | 28,34   | 76,34  |
| CS   | 10    | 3,67    | 27,20                   | 0,043 | 0,12       | 362,13 | 401,18 | 28,19   | 2,65   |
| CS   | 60    | 4,17    | 23,98                   | 0,038 | 0,14       | 282,82 | 237,24 | 26,91   | 1,20   |
| CS   | 60    | 3,67    | 27,33                   | 0,043 | 0,25       | 177,66 | 273,69 | 34,26   | 0,91   |
| CS   | 60    | 2,83    | 35,15                   | 0,056 | 0,20       | 186,67 | 243,49 | 29,75   | 1,98   |
| CS   | 60    | 3,83    | 26,07                   | 0,041 | 0,13       | 247,07 | 207,81 | 27,08   | 1,28   |
| CS   | 60    | 4,33    | 23,10                   | 0,037 | 0,13       | 313,84 | 346,29 | 24,56   | 4,98   |
| PH   | 0     | 8,33    | 11,98                   | 0,014 | 2,09       | 114,47 | 466,31 | 59,96   | 0,40   |
| PH   | 0     | 7,17    | 13,97                   | 0,016 | 2,61       | 116,90 | 448,58 | 56,70   | 0,56   |
| PH   | 0     | 7,33    | 13,66                   | 0,016 | 1,86       | 104,76 | 399,61 | 53,55   | 0,32   |
| PH   | 0     | 8,17    | 12,23                   | 0,014 | 3,35       | 77,65  | 588,16 | 65,83   | 0,37   |
| PH   | 0     | 7,17    | 13,95                   | 0,016 | 1,82       | 105,78 | 357,98 | 62,55   | 0,18   |
| PH   | 10    | 5,17    | 19,37                   | 0,022 | 1,34       | 167,75 | 497,24 | 50,00   | 0,53   |
| PH   | 10    | 5,50    | 18,18                   | 0,021 | 1,63       | 160,41 | 644,41 | 50,27   | 0,70   |
| PH   | 10    | 4,67    | 21,42                   | 0,024 | 1,89       | 188,64 | 613,85 | 48,60   | 1,00   |
| PH   | 10    | 6,17    | 16,23                   | 0,018 | 2,09       | 172,94 | 498,13 | 43,77   | 0,78   |
| PH   | 10    | 4,17    | 24,00                   | 0,027 | 1,50       | 158,93 | 553,59 | 59,45   | 0,96   |
| PH   | 60    | 4,67    | 21,46                   | 0,024 | 0,94       | 250,72 | 429,36 | 29,88   | 2,87   |
| PH   | 60    | 3,17    | 31,54                   | 0,036 | 0,82       | 249,94 | 401,05 | 34,64   | 2,74   |
| PH   | 60    | 4,17    | 24,02                   | 0,027 | 0,74       | 270,79 | 333,05 | 19,13   | 3,37   |
| PH   | 60    | 3,67    | 27,24                   | 0,031 | 0,91       | 192,17 | 344,15 | 35,45   | 1,74   |
| PH   | 60    | 2,67    | 37,49                   | 0,043 | 0,68       | 332,50 | 472,49 | 33,24   | 4,53   |
| QP   | 0     | 9,17    | 10,99                   | 0,026 | 1,82       | 153,92 | 459,36 | 39,65   | 3,51   |
| QP   | 0     | 8,33    | 12,07                   | 0,029 | 3,07       | 130,64 | 475,37 | 41,43   | 5,79   |
| QP   | 0     | 8,67    | 11,54                   | 0,027 | 3,52       | 189,00 | 511,21 | 51,14   | 5,47   |
| QP   | 0     | 7,50    | 13,34                   | 0,032 | 1,22       | 127,45 | 405,64 | 46,56   | 11,89  |
| QP   | 0     | 8,50    | 11,77                   | 0,028 | 2,64       | 138,51 | 418,99 | 43,17   | 7,78   |
| QP   | 10    | 8,83    | 11,32                   | 0,027 | 1,49       | 141,61 | 340,22 | 38,73   | 4,16   |
| QP   | 10    | 6,33    | 15,71                   | 0,037 | 1,41       | 86,05  | 830,06 | 38,24   | 11,14  |
| QP   | 10    | 6,83    | 14,64                   | 0,035 | 0,92       | 180,33 | 465,09 | 34,79   | 10,91  |
| QP   | 10    | 7,50    | 13,36                   | 0,032 | 1,41       | 168,93 | 485,86 | 47,43   | 6,63   |
| QP   | 10    | 7,00    | 14,30                   | 0,034 | 0,60       | 133,11 | 519,73 | 44,49   | 9,16   |
| QP   | 60    | 5,17    | 19,36                   | 0,046 | 1,11       | 178,84 | 384,69 | 42,24   | 9,93   |
| QP   | 60    | 5,83    | 17,16                   | 0,041 | 0,74       | 175,85 | 332,48 | 34,00   | 5,38   |
| QP   | 60    | 6,00    | 16,70                   | 0,040 | 0,81       | 212,30 | 432,49 | 49,77   | 12,56  |
| QP   | 60    | 5,67    | 17,68                   | 0,042 | 0,50       | 235,30 | 411,82 | 31,07   | 19,29  |
| QP   | 60    | 6,50    | 15,42                   | 0,037 | 0,47       | 116,85 | 469,55 | 33,69   | 29,00  |
