# Supplementary material
Source: MDPI journal article supplement (https://www.mdpi.com/2571-6255/2/2/33)

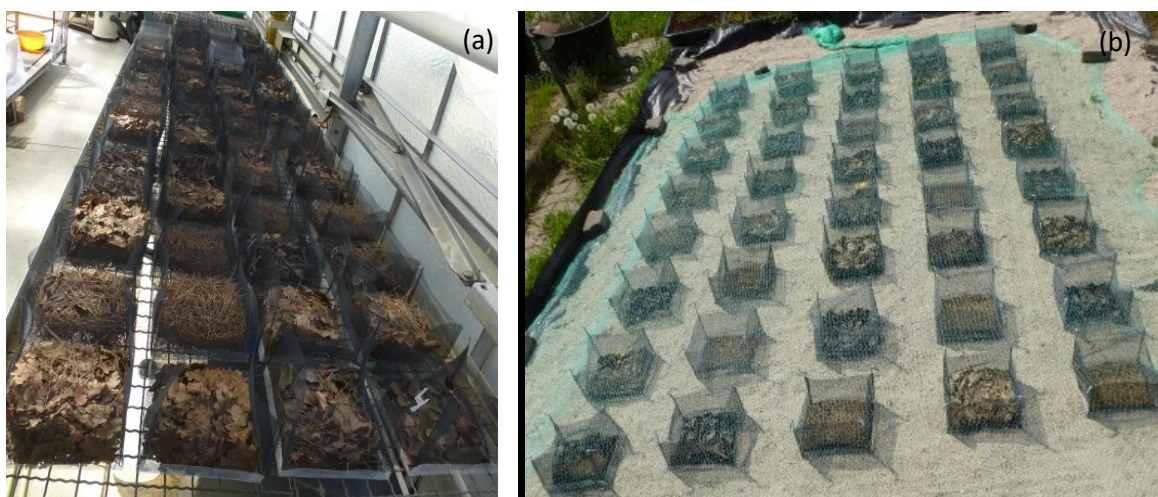

**Figure S1.** Established treatments. (a) treatment “10”, (b) treatment “60”.

Supplement: s1 [file s1]
